# Supplementary material for: Comparing actuarial and subjective healthy life expectancy estimates: A cross-sectional survey among the general population in Hungary
Source: PubMed Central journal article supplement (PMC8912206; doi:10.1371/journal.pone.0264708), 2022-03-10

## S1 Appendix. Details of survey items on subjective expectations and applied data transformations

### A) Inquiring subjective life expectancy (sLE) using the point-estimate method

“According to your opinion, until what age will you live?”

### B) Inquiring future health expectations (adapted Global Activity Limitation Indicator, GALI)

Question item: “According to your opinion, will you be limited for at least 6 months in activities people usually do because of health problems, and if yes, to what extent?”

The response options for the relevant ages (60, 70, 80, 90):

“At the age of ..., I will be:

- not limited at all
- limited but not severely
- severely limited”

### C) Imputing subjective healthy life expectancy (sHLE) point estimates

Point estimates of sHLE were imputed according to respondents’ current (at the time of survey) and future GALI responses (at ages 60,70,80 and 90) and sLE according to Eq. 1,

$$sHLE = \begin{cases} \text{type 1: } \frac{a_h + a_l - 0.5}{2} & \text{if } \exists a_h \wedge \exists a_l \wedge sLE > a_l \\ \text{type 2: } \frac{a_h + sLE}{2} & \text{if } \exists a_h \wedge \nexists a_l \wedge sLE < a_h + 10 \\ \text{type 3: } \frac{x + a_l - 0.5}{2} & \text{if } \nexists a_h \wedge \exists a_l \wedge sLE > a_l \wedge H = h \\ \text{type 4: } \frac{x + sLE}{2} & \text{if } \nexists a_h \wedge 0 \leq sLE < x + 10 \wedge H = h \\ \text{type 5: } x - 5.25 & \text{if } \nexists a_h \wedge H = l \end{cases} \quad (1)$$

Notation:

$x$ : respondents’ age

$sLE$ : the point estimate of subjective life expectancy

$a_h \in \{60,70,80,90\}$ : the greatest future (healthy) age without expected limitation

$\exists a_h$ : future healthy age expectation is reported (e.g., 60 years)

$\nexists a_h$ : future healthy age expectation is not reported (e.g., the respondent expects disability from 60 years of age)

$a_l \in \{60,70,80,90\}$ : the earliest expected future age with limitation ( $x \leq a_l$ )

$\exists a_l$ : earliest future age with expected limitation reported (e.g., 70 years)

$\nexists a_l$ : earliest future age with expected limitation is not reported (e.g., no limitations at 70 years, expected death at 75 years)

$H \in \{h, l\}$ : current health measured by GALI ( $H = h$ : no current limitation,  $H = l$ : any current limitation)

sHLE point estimate imputation types:

**Type 1:** both  $a_h$  and  $a_l$  are provided by the respondent,  $sHLE$  is the mean of possible ages without limitation

**Type 2:**  $a_h$  and sLE are provided by the respondent,  $sHLE$  is the mean of possible ages without limitation until expected death

(Assumption: if  $a_h$  was provided, then we assumed that respondents' current limitations were temporary and would subside.)

**Type 3:** no current limitation at age  $x$ , the future expectation is limitation ( $a_l$ ) with no future healthy age reported ( $a_h$ ): sHLE is the weighted mean of all possible ages without limitation between  $x$  and  $a_l$

**Type 4:** no current limitation at age  $x$ , death is expected earlier than future ages with ( $a_l$ ) or without limitation ( $a_h$ ): sHLE is the weighted mean of all possible ages without limitation between  $x$  and  $sLE$ .

**Type 5:** current limitation at age  $x$ , no future age expected without limitation: sHLE is the weighted mean of possible healthy ages before age  $x$ . (Assumption: the limitation commenced any time during the past 10 years).

Further assumptions: the imagination of immediate death in a healthy person is possible; the GALI suggests 6 months limited period before the commencement of expected future limitations. (Hence the  $-0.5$  adjustment in the formulas of type 1-, 3- and 5 estimates.)

**D) Examples for subjective healthy life expectancy (sHLE) imputation and incongruent response patterns**

| Type        | Age (x) | $H_x$ | $H_{60}$ | $H_{70}$ | $H_{80}$ | $H_{90}$ | $a_h$ | $a_l$ | sLE | sHLE  |
|-------------|---------|-------|----------|----------|----------|----------|-------|-------|-----|-------|
| 1           | 56      | $h$   | $h$      | $h$      | $l$      | $l$      | 70    | 80    | 88  | 74.75 |
|             | 67      | $l$   | -        | $h$      | $h$      | $h$      | 90    | -     | 96  | 93    |
| 2           | 53      | $h$   | $h$      | $h$      | -        | -        | 70    | -     | 78  | 74    |
|             | 64      | $l$   | -        | $h$      | $h$      | -        | 80    | -     | 86  | 83    |
| 3           | 58      | $h$   | $l$      | $l$      | $l$      | -        | -     | 60    | 80  | 58.75 |
|             | 79      | $h$   | -        | -        | $l$      | -        | -     | 80    | 85  | 79.25 |
| 4           | 62      | $h$   | $l$      | -        | -        | -        | -     | 60    | 65  | 63.5  |
|             | 80      | $h$   | -        | -        | $l$      | -        | -     | -     | 81  | 80.5  |
| 5           | 51      | $l$   | $l$      | $l$      | -        | -        | -     | -     | 75  | 45.75 |
|             | 78      | $l$   | -        | -        | $l$      | $l$      | -     | -     | 90  | 72.75 |
| Incongruent | 53      | $h$   | $h$      | $l$      | $h$      | $l$      | -     | -     | 95  | -     |
| Incongruent | 69      | $l$   | -        | $l$      | $h$      | $l$      | -     | -     | 90  | -     |

$H_x$ : current limitation at age  $x$ , measured with the Global Activity Limitation Indicator (GALI),  $H_{60}$ - $H_{90}$  future health expectations measured by adapted GALI;  $h$ : no limitation,  $l$ : any limitation,  $a_h$ : highest future age without expected limitation,  $a_l$ : lowest future age with expected limitation, sLE: subjective life expectancy; sHLE: subjective healthy life expectancy

*E) Subjective healthy life expectancy (sHLE) by imputation types*

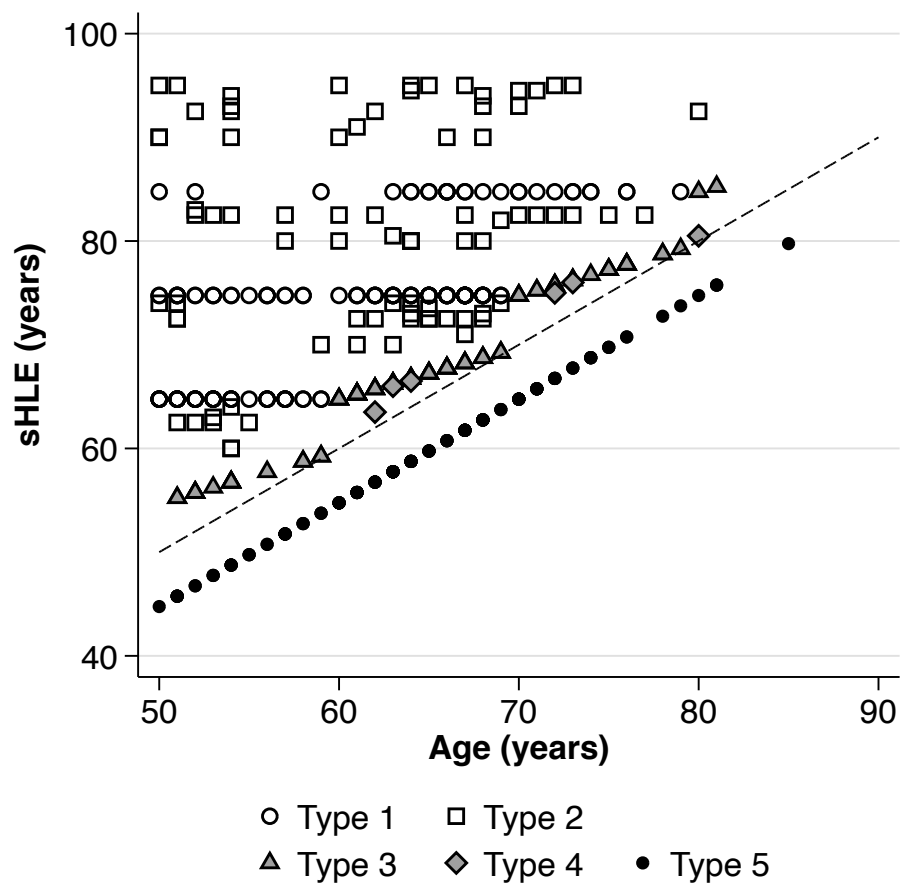

Supplement: pone.0264708.s005.pdf [file pone.0264708.s005.pdf]
