# Supplementary material for: Comparing actuarial and subjective healthy life expectancy estimates: A cross-sectional survey among the general population in Hungary
Source: PubMed Central journal article supplement (PMC8912206; doi:10.1371/journal.pone.0264708), 2022-03-10

**S1 Fig. Distribution of A) subjective life expectancy (sLE) in men, B) sLE in women, C) subjective healthy life expectancy (sHLE) in men and D) sHLE in women**

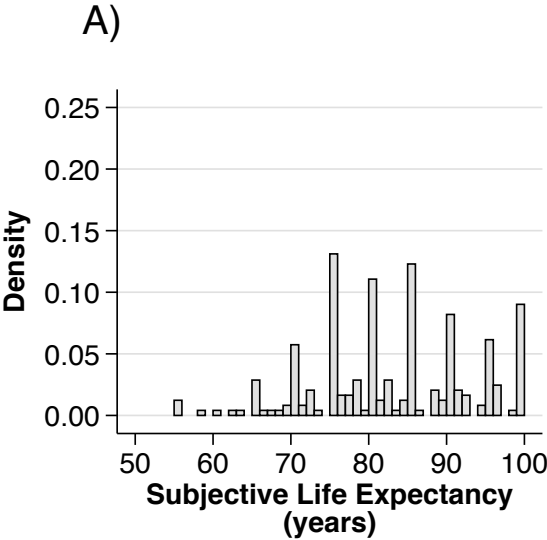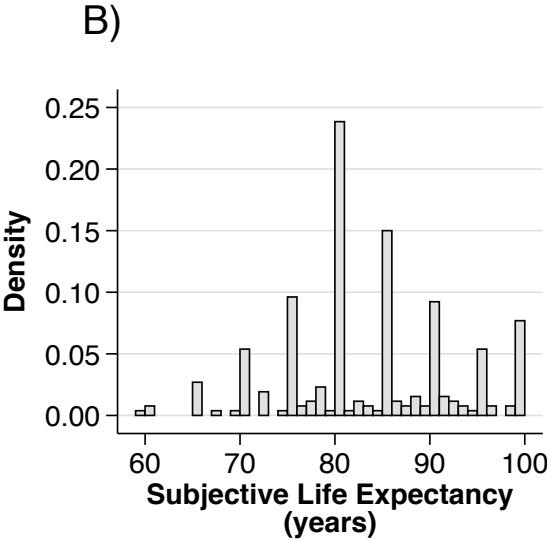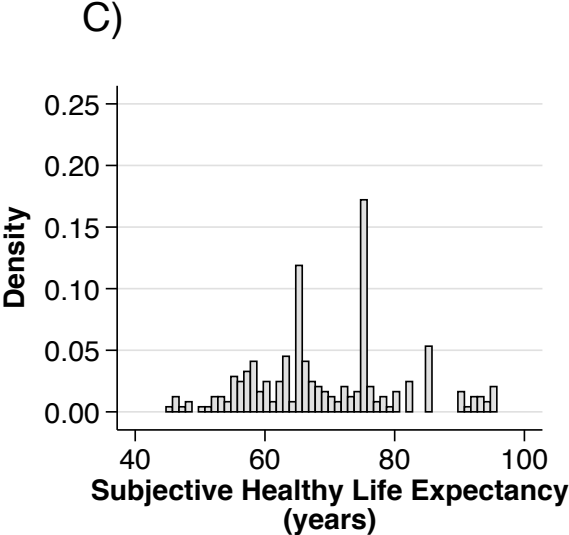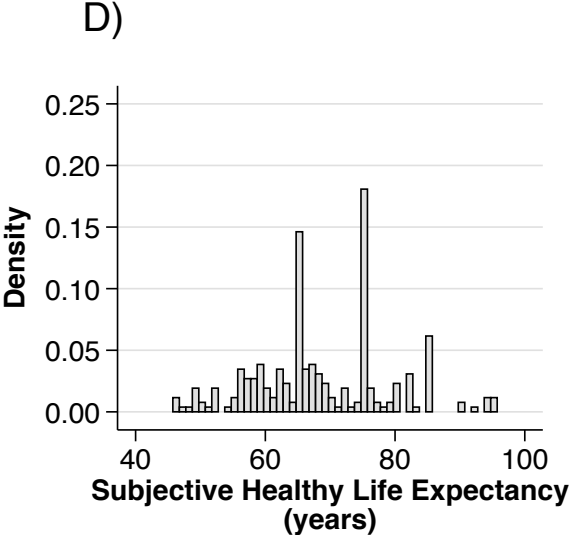

Supplement: pone.0264708.s001.pdf [file pone.0264708.s001.pdf]
