# Supplementary material for: Comparing actuarial and subjective healthy life expectancy estimates: A cross-sectional survey among the general population in Hungary
Source: PubMed Central journal article supplement (PMC8912206; doi:10.1371/journal.pone.0264708), 2022-03-10
Supplement: pone.0264708.s002.pdf [file pone.0264708.s002.pdf]

**S2 Fig. Subjective life expectancy (sLE) versus subjective healthy life expectancy (sHLE) in men and women**

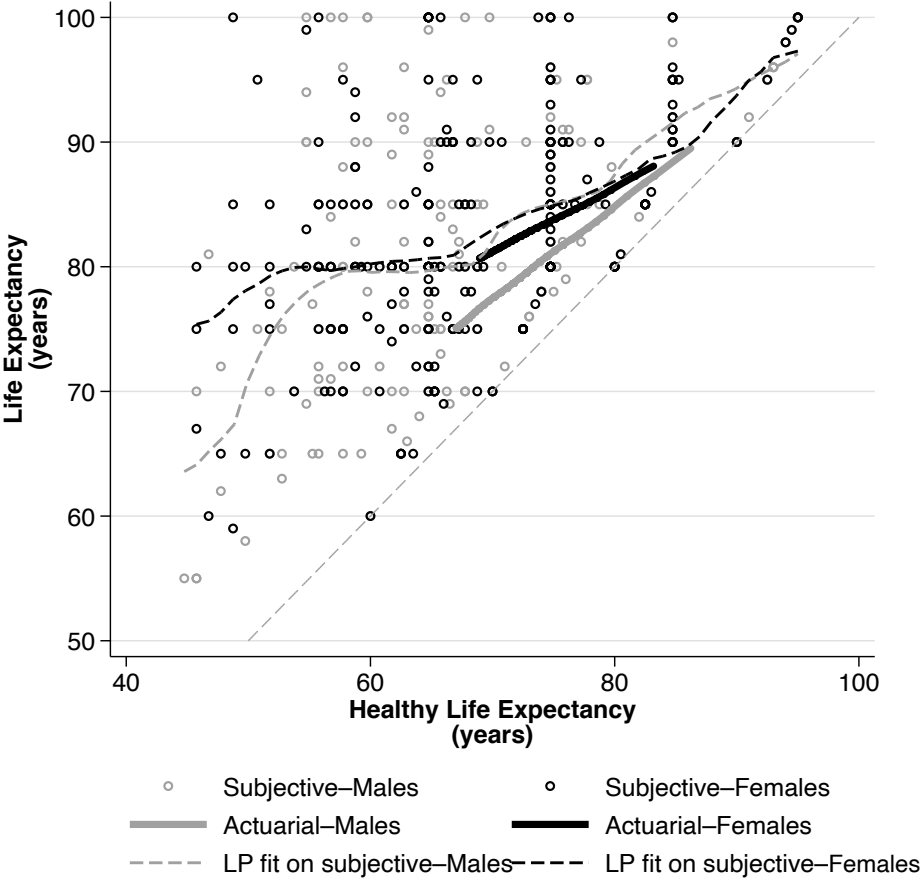

LP: local polynomial
