# Supplementary material for: Comparing actuarial and subjective healthy life expectancy estimates: A cross-sectional survey among the general population in Hungary
Source: PubMed Central journal article supplement (PMC8912206; doi:10.1371/journal.pone.0264708), 2022-03-10
Supplement: pone.0264708.s006.pdf [file pone.0264708.s006.pdf]

## S2 Appendix. Estimating actuarial healthy life years (HLY) for each age year from abridged HLY tables

Notation:

$HLY_i$ : actuarial HLY for 5-year age groups  $i$  ( $i \in \{50 - 54, 55 - 59, \dots, 80 - 84\}$ ), reported the Hungarian Central Statistical Office (HCSO)

$HLY'_x$ : intermediate estimates of actuarial healthy life years for age  $x$

$HLY_x$ : estimated actuarial healthy life years for age  $x$  ( $x \in \{50, 51, \dots, 84\}$ )

$HLY_{85}$ : estimated actuarial healthy life years for 85 years of age

$mHLY_{xi}$ : mean  $HLY_x$  in age group  $i$

$TH'_x$ : intermediate estimates of cumulative healthy years lived from year  $x$

$TH_x$ : estimated cumulative healthy years lived from year  $x$

$l_x$ : the number of persons who reached age  $x$ , reported by the HCSO

$H'_x$ : intermediate estimates of healthy years for the cohort aged  $x$

$H_x$ : smoothed estimates of healthy years for the cohort aged  $x$

$hq'_x$ : intermediate conditional probability estimates of becoming limited in age  $x$  given being healthy in year  $x-1$ . ( $hq'_x < 1$ )

$hq_x$ : conditional probability estimates of becoming limited in age  $x$  given being healthy in year  $x-1$ . ( $0 < hq_x < 1$ )

Estimation procedure of  $HLY_x$ :

**Step 1:** we predicted  $HLY'_x$  by fitting a piecewise linear regression on  $HLY_i$  for age groups  $i$  ( $i \in \{50 - 54, 55 - 59, \dots, 80 - 84\}$ ) for both sexes using a spline of age as predictor with knots in age-group boundaries (e.g., 50, 55, 80, 85).

### Healthy life year estimates for age years 50-84 in A) men and B) women

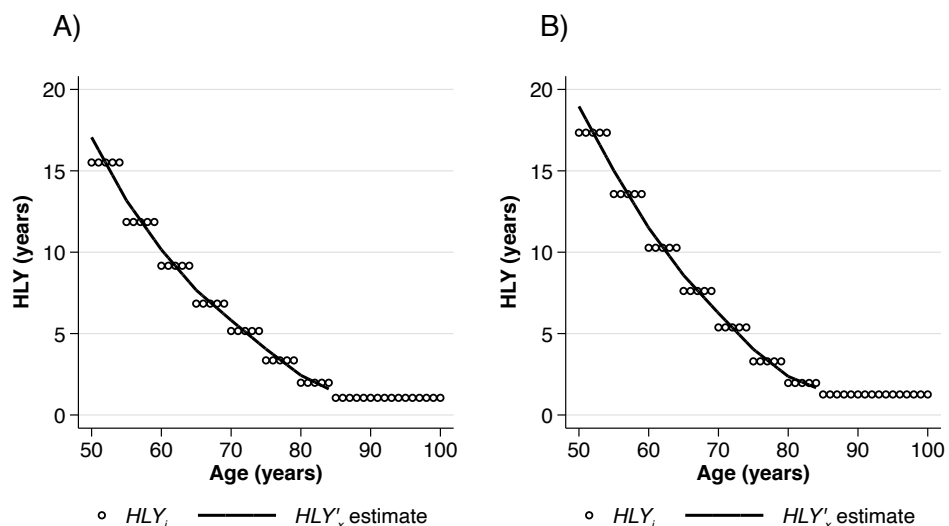

**Step 2:** by reversing calculations of the Sullivan method, from  $l_x$  of the life table, and  $HLY'_x$  from Step 1, we calculated  $TH'_x$  using the formula  $TH'_x = l_x * HLY'_x$ .

**Step 3:** we calculated  $H'_x$  for each age  $x$  via  $H'_x = TH'_x - TH'_{x+1}$ .

**Step 4:** we obtained  $hq'_x$  by using the formula  $hq'_x = 1 - \frac{H'_x}{H'_{x-1}}$ . Since we identified negative  $hq'_x$  values, we considered  $H'_x$  estimates implausible.

**Step 5:** we estimated  $H_x$  by smoothing  $H'_x$  via a piecewise regression using the age spline of Step 1.

**Cumulative cohort healthy life years ( $H_x$ ) estimates for age years 50-84 in A) men and B) women**

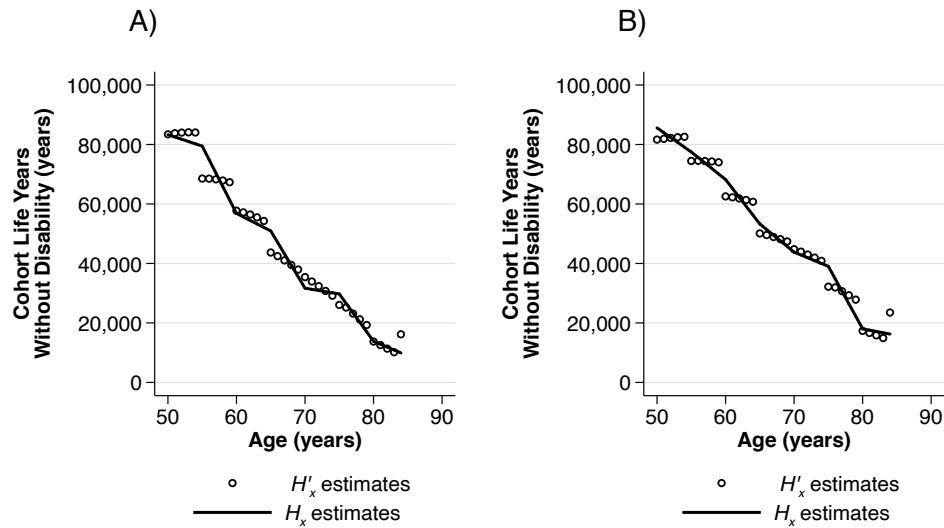

**Step 6:** we obtained  $TH_x$  by the formula  $TH_x = \sum_{n \geq x} H_n$ .

**Step 7:** we obtained  $hq_x$  by using the formula  $hq_x = 1 - \frac{TH_x}{TH_{x-1}}$  and verified the plausibility of  $H_x$  estimates by observing for each  $hq_x$  that  $0 < hq_x < 1$ .

**Proportion becoming limited ( $hq_x$ ), if being healthy in preceding year in A) men and B) women**

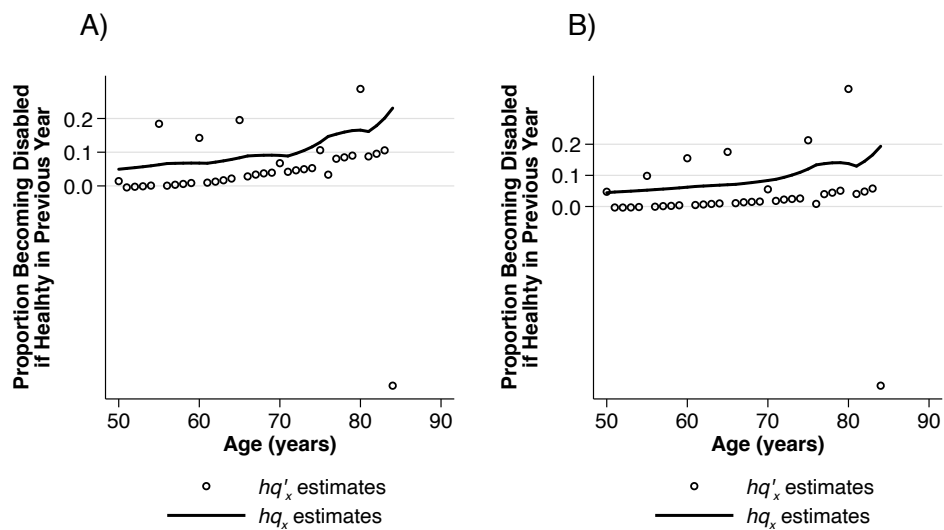

**Step 8:** we obtained  $HLY_x$  via the Sullivan calculation using  $H_x$  from Step 5:  $HLY_x = \frac{\sum_{n \geq x} H_n}{l_x}$ .

**Step 9:** we estimated  $HLY_{85}$  as follows: since  $HLY_i$  represents the average healthy life expectancy for the entire 85+ age-group ( $HLY_{85+}$ ), assuming that  $HLY_{85} = HL Y_{85+}$  would underestimate healthy life expectancies in all ages  $x \geq 85$  years. Therefore, we used  $HLY_{85} = HL Y_{85+} + d$  in the model and determined  $d$  via numeric optimisation so that the squared difference between  $HLY_i$  and  $mHL Y_{xi}$  was set to minimum.

***Healthy life years by 5-year age groups ( $HLY_i$ ) and means of yearly healthy life year estimates by 5-year age groups ( $mHL Y_{xi}$ ) in A) men and B) women***

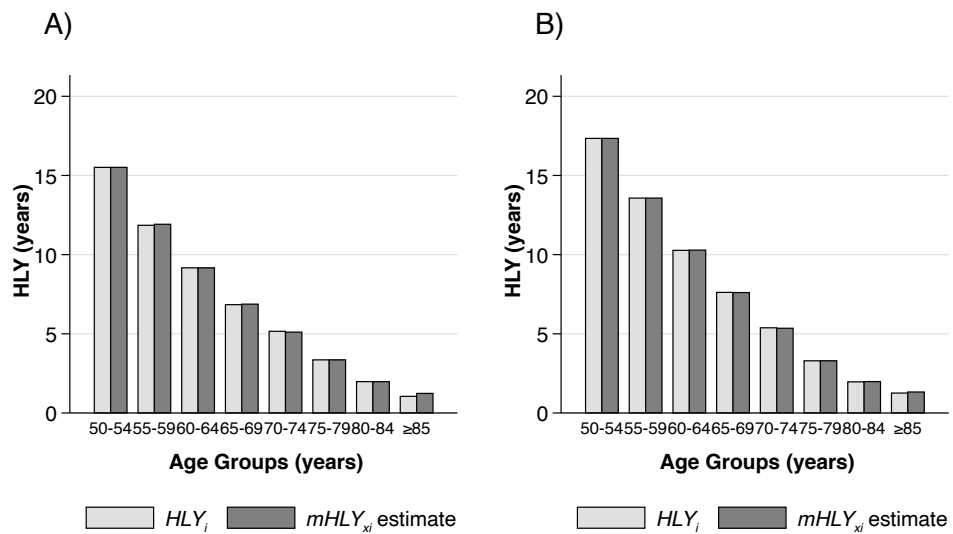

**Step 10:** we obtained  $HLE_x = HL Y_x + x$  for all ages  $x$  from 50 to 85 years.
